# Supplementary material for: ERK MAP Kinase Signaling Regulates RAR Signaling to Confer Retinoid Resistance on Breast Cancer Cells
Source: MDPI journal article supplement (doi:10.3390/cancers14235890), 2022-11-29
Supplement: s1 [file s1]

**Table S3. Gene sets significantly overlapped with RA- and ERK-upregulated genes****RA-upregulated genes**

| Gene set                                   | Description                                                                                                          | p-value  | FDR q-value |
|--------------------------------------------|----------------------------------------------------------------------------------------------------------------------|----------|-------------|
| HALLMARK_ESTROGEN_RESPOSE_EARLY            | Genes defining early response to estrogen.                                                                           | 3.37E-26 | 1.69E-24    |
| HALLMARK_ESTROGEN_RESPOSE_LATE             | Genes defining late response to estrogen.                                                                            | 2.13E-16 | 5.33E-15    |
| HALLMARK_UV_RESPONSE_DN                    | Genes down-regulated in response to ultraviolet (UV) radiation.                                                      | 1.53E-13 | 2.55E-12    |
| HALLMARK_IL2_STAT5_SIGNALING               | Genes up-regulated by STAT5 in response to IL2 stimulation.                                                          | 9.72E-07 | 1.21E-05    |
| HALLMARK_TGF_BETA_SIGNALING                | Genes up-regulated in response to TGFB1 [GeneID=7040].                                                               | 1.24E-05 | 1.23E-04    |
| HALLMARK_TNFA_SIGNALING_VIA_NFKB           | Genes regulated by NF-kB in response to TNF [GeneID=7124].                                                           | 1.48E-05 | 1.23E-04    |
| HALLMARK_EPITHELIAL_MESENCHYMAL_TRANSITION | Genes defining epithelial-mesenchymal transition, as in wound healing, fibrosis and metastasis.                      | 1.85E-04 | 8.39E-04    |
| HALLMARK_G2M_CHECKPOINT                    | Genes involved in the G2/M checkpoint, as in progression through the cell division cycle.                            | 1.85E-04 | 8.39E-04    |
| HALLMARK_GLYCOLYSIS                        | Genes encoding proteins involved in glycolysis and gluconeogenesis.                                                  | 1.85E-04 | 8.39E-04    |
| HALLMARK_HEME_METABOLISM                   | Genes involved in metabolism of heme (a cofactor consisting of iron and porphyrin) and erythroblast differentiation. | 1.85E-04 | 8.39E-04    |
| HALLMARK_P53_PATHWAY                       | Genes involved in p53 pathways and networks.                                                                         | 1.85E-04 | 8.39E-04    |
| HALLMARK_APOPTOSIS                         | Genes mediating programmed cell death (apoptosis) by activation of caspases.                                         | 8.56E-04 | 3.57E-03    |

**ERK-upregulated genes**

| Gene set                           | Description                                                                               | p-value  | FDR q-value |
|------------------------------------|-------------------------------------------------------------------------------------------|----------|-------------|
| HALLMARK_INTERFERON_GAMMA_RESPONSE | Genes up-regulated in response to IFNG [GeneID=3458].                                     | 4.89E-28 | 2.45E-26    |
| HALLMARK_INTERFERON_ALPHA_RESPONSE | Genes up-regulated in response to alpha interferon proteins.                              | 8.66E-26 | 2.16E-24    |
| HALLMARK_E2F_TARGETS               | Genes encoding cell cycle related targets of E2F transcription factors.                   | 1.27E-13 | 2.12E-12    |
| HALLMARK_G2M_CHECKPOINT            | Genes involved in the G2/M checkpoint, as in progression through the cell division cycle. | 7.61E-04 | 7.61E-03    |
| HALLMARK_TNFA_SIGNALING_VIA_NFKB   | Genes regulated by NF-kB in response to TNF [GeneID=7124].                                | 7.61E-04 | 7.61E-03    |
