# Supplementary material for: ERK MAP Kinase Signaling Regulates RAR Signaling to Confer Retinoid Resistance on Breast Cancer Cells
Source: MDPI journal article supplement (doi:10.3390/cancers14235890), 2022-11-29
Supplement: s1 [file s1]

**Table S1. Genes up- or down-regulated by the poly (DMAAm-co-APTMA) hydrogel****Upregulated genes**

| <b>Gene symbol</b> | <b>Fold change (log2) (PS vs Gel)</b> | <b><i>p</i>-value</b> |
|--------------------|---------------------------------------|-----------------------|
| H2AC19             | 11.82147115                           | 1.70953E-13           |
| PYURF              | 8.475679867                           | 3.41973E-08           |
| H4C12              | 7.757044098                           | 2.36136E-06           |
| EGR4               | 7.068645966                           | 2.30443E-05           |
| TRIM39-RPP21       | 6.632918743                           | 0.000140844           |
| POTEJ              | 5.632486792                           | 0.004818226           |
| LBP                | 5.544325146                           | 0.006437024           |
| SLC13A4            | 5.003001088                           | 0.027443888           |
| KCNE4              | 4.715561639                           | 0.048246457           |
| FOSB               | 4.256055714                           | 0.001780163           |
| ITIH2              | 4.191536118                           | 4.80845E-31           |
| IL1R2              | 4.111999766                           | 0.03612388            |
| NCMAP              | 4.091780464                           | 0.036645023           |
| TCN1               | 3.997895582                           | 0.043948191           |
| MUC2               | 3.743302775                           | 3.04229E-28           |
| ABCC11             | 3.542396429                           | 0.001182387           |
| BPIFA2             | 3.503864526                           | 0.009592407           |
| GJC3               | 3.274000186                           | 0.040392128           |
| GP2                | 3.155385006                           | 0.000158058           |
| FOXA3              | 2.984205891                           | 0.005185995           |
| APOA1              | 2.926774365                           | 0.019962862           |
| SLC5A5             | 2.899785058                           | 0.003743151           |
| KCP                | 2.652457195                           | 1.78477E-06           |
| EGR2               | 2.603231962                           | 1.97013E-05           |
| PSAPL1             | 2.54766972                            | 2.46315E-18           |
| MTRNR2L3           | 2.511710161                           | 8.95713E-08           |
| FGB                | 2.465838643                           | 0.000980323           |
| CCRL2              | 2.416500601                           | 0.043888878           |
| TMEM45A            | 2.415680057                           | 0.045754543           |
| AOC1               | 2.347695744                           | 0.004906034           |
| CFB                | 2.292331365                           | 0.000988397           |
| PLAT               | 2.273991257                           | 9.42217E-18           |
| MUC5AC             | 2.258652048                           | 2.07527E-26           |
| HAAO               | 2.241183454                           | 0.023033629           |
| S100A7             | 2.100452391                           | 0.001602938           |

|               |             |             |
|---------------|-------------|-------------|
| HMGCS2        | 2.053549711 | 0.000341472 |
| SLC44A4       | 2.036188463 | 0.026991565 |
| EGR1          | 1.999849727 | 1.21365E-25 |
| CD14          | 1.981910143 | 0.033019803 |
| SLC25A18      | 1.976359451 | 0.027345148 |
| AQP3          | 1.939706996 | 1.02096E-38 |
| AGXT          | 1.933923922 | 0.008476058 |
| CA9           | 1.875489961 | 0.001034359 |
| KCNMA1        | 1.829835647 | 0.011813357 |
| PTPRN2        | 1.815413449 | 5.65366E-18 |
| SBSN          | 1.78987282  | 0.013767005 |
| MTRNR2L6      | 1.782111126 | 1.0653E-06  |
| AZGP1         | 1.779308224 | 5.49287E-18 |
| TNFRSF11B     | 1.733567246 | 0.033387152 |
| CEMIP         | 1.716596012 | 2.12197E-10 |
| CCNP          | 1.711559669 | 2.10371E-17 |
| GSTA1         | 1.693755265 | 0.014312379 |
| PCOTH         | 1.668063074 | 0.002909773 |
| IL32          | 1.65535413  | 0.027036656 |
| GCNT2         | 1.638958959 | 0.029055101 |
| TNFSF10       | 1.635239008 | 0.010395637 |
| THEG          | 1.603836942 | 0.021148397 |
| ATP6V0A4      | 1.601832669 | 4.29987E-06 |
| UPK3A         | 1.59544316  | 3.49144E-05 |
| MTRNR2L1      | 1.582241812 | 2.26438E-26 |
| MTRNR2L8      | 1.57967652  | 5.70438E-32 |
| CEACAM6       | 1.568961456 | 1.54605E-26 |
| RASD1         | 1.539056286 | 2.93833E-10 |
| NPC1L1        | 1.537909123 | 0.01001862  |
| SYT13         | 1.52030608  | 1.12916E-07 |
| APOD          | 1.512856047 | 3.58117E-12 |
| CCL22         | 1.501348741 | 0.004472153 |
| CEACAM5       | 1.501200756 | 1.1623E-27  |
| SMPD3         | 1.493708577 | 8.05821E-05 |
| UPK1B         | 1.490554167 | 0.019259179 |
| BCL2L2-PABPN1 | 1.477243136 | 0.000147079 |
| PARM1         | 1.477069223 | 2.38561E-10 |
| KLK10         | 1.46553659  | 2.88328E-09 |
| MSMB          | 1.464048906 | 8.24437E-07 |

|           |             |             |
|-----------|-------------|-------------|
| CSTA      | 1.460629774 | 0.015456252 |
| CXCL17    | 1.459125437 | 0.000460144 |
| MTRNR2L2  | 1.457923099 | 1.76071E-23 |
| SYNPO2L   | 1.457135295 | 0.027249913 |
| CREB3L1   | 1.450341913 | 4.93885E-14 |
| BPIFB1    | 1.445286739 | 4.73984E-07 |
| SLC15A3   | 1.445054702 | 0.009712993 |
| FBN1      | 1.444775329 | 9.22021E-06 |
| SLC16A5   | 1.437716142 | 0.025947953 |
| TSPAN1    | 1.428406379 | 2.15115E-12 |
| SAMD9     | 1.422539402 | 0.020197846 |
| WNK4      | 1.421596375 | 0.034276283 |
| MAOA      | 1.417208543 | 1.58307E-10 |
| LCN2      | 1.414999087 | 0.0255547   |
| SDR16C5   | 1.406617405 | 4.23785E-05 |
| AOX1      | 1.3916843   | 8.25087E-06 |
| CHRM1     | 1.386643186 | 1.57638E-05 |
| RNASE4    | 1.385708354 | 0.000629413 |
| PTAFR     | 1.381033498 | 0.000190379 |
| B3GNT6    | 1.379164943 | 0.026289411 |
| ANG       | 1.376339723 | 0.000577891 |
| DEPP1     | 1.365200611 | 0.004842496 |
| OAS1      | 1.363723497 | 1.03602E-05 |
| MTRNR2L9  | 1.351957264 | 1.44788E-08 |
| WLS       | 1.339346414 | 0.037332608 |
| C14orf132 | 1.335974102 | 1.44723E-16 |
| SMIM22    | 1.315811874 | 0.002260533 |
| SERPINA5  | 1.310599678 | 1.1642E-09  |
| SPOCD1    | 1.296335197 | 0.002447652 |
| TNFRSF19  | 1.286933227 | 0.010569694 |
| KLK11     | 1.280664376 | 6.64916E-14 |
| HSD17B11  | 1.2749528   | 0.00048649  |
| PTPRH     | 1.267026276 | 0.000914601 |
| ELAPOR1   | 1.266611705 | 2.45197E-19 |
| FN1       | 1.253927793 | 3.44215E-14 |
| SOX21     | 1.252090339 | 1.37484E-05 |
| SDCBP2    | 1.247413189 | 0.027955792 |
| ADCY5     | 1.24204469  | 1.30588E-11 |
| SLIT1     | 1.231698959 | 0.032528138 |

|              |             |             |
|--------------|-------------|-------------|
| NR4A1        | 1.229999682 | 0.013548417 |
| C1orf116     | 1.21604708  | 0.001321517 |
| IL2RB        | 1.212801482 | 0.005387866 |
| EMP1         | 1.210160207 | 0.002538688 |
| C2CD4A       | 1.202816698 | 0.004549039 |
| MMP28        | 1.202571188 | 0.028770363 |
| CCDC103      | 1.200097358 | 0.00157574  |
| ANKRD35      | 1.195336097 | 0.00111648  |
| TFF1         | 1.195245001 | 2.2197E-16  |
| NDRG1        | 1.188259965 | 5.2303E-13  |
| FOXD2        | 1.184404997 | 0.049234833 |
| EPHB6        | 1.175497001 | 0.031315594 |
| WDFY4        | 1.163979982 | 0.004617686 |
| SPAG4        | 1.14724457  | 5.12332E-05 |
| RIMBP3B      | 1.145969938 | 0.008699834 |
| KLK13        | 1.135121972 | 0.041758286 |
| SERPINA3     | 1.133996254 | 1.7937E-13  |
| CXCR4        | 1.127599224 | 0.000607587 |
| FUT3         | 1.122232361 | 0.032500784 |
| CAPN9        | 1.121543821 | 5.0957E-06  |
| AMTN         | 1.118311945 | 0.032796411 |
| ITIH6        | 1.109155181 | 0.000706263 |
| SERHL2       | 1.105077975 | 0.000582153 |
| ETV4         | 1.089241479 | 3.07479E-05 |
| CRAT         | 1.073738149 | 1.98371E-10 |
| FAM161B      | 1.072199081 | 5.53949E-05 |
| TNIK         | 1.072010007 | 0.000394267 |
| CTSO         | 1.064714941 | 0.02983675  |
| FBXO32       | 1.063966141 | 7.08168E-05 |
| RAB27B       | 1.057004676 | 2.21212E-09 |
| CD44         | 1.043705758 | 2.1116E-10  |
| NUCB2        | 1.043434388 | 5.35248E-12 |
| RGPD5        | 1.03966957  | 0.000373731 |
| PRODH        | 1.035986463 | 0.028990554 |
| S1PR3        | 1.03472788  | 5.55138E-10 |
| AKAP12       | 1.018878691 | 0.02648715  |
| LOC102724788 | 1.017682138 | 4.56235E-07 |
| SHC4         | 1.015721742 | 2.91826E-06 |
| DGLUCY       | 1.013088812 | 0.029555396 |

|         |             |             |
|---------|-------------|-------------|
| UGT2B15 | 1.006151069 | 0.000729387 |
| TFPI2   | 1.003793196 | 0.00913227  |

#### Downregulated genes

| Gene symbol   | Fold change (log2) (PS vs Gel) | p-value     |
|---------------|--------------------------------|-------------|
| F8A2          | -22.66606472                   | 2.17288E-06 |
| DNAJC25-GNG10 | -6.773104292                   | 0.032542623 |
| PLGLB2        | -5.573073699                   | 0.005041588 |
| GPR75-ASB3    | -5.364290614                   | 0.009630212 |
| ABHD14A-ACY1  | -5.017996286                   | 0.022804238 |
| CTAGE4        | -4.914600653                   | 0.000320662 |
| RGPD6         | -4.906215364                   | 2.45804E-14 |
| KCNAB3        | -4.805437711                   | 0.009266867 |
| PDIA2         | -4.170833602                   | 0.037767728 |
| RHBDL1        | -3.449514385                   | 3.31065E-05 |
| TNFRSF25      | -3.393755106                   | 2.34893E-05 |
| TPTE          | -3.288525371                   | 0.000596127 |
| GOLGA8B       | -3.273766179                   | 0.001677558 |
| GOLGA6L10     | -3.114519261                   | 0.00049746  |
| C1QTNF3       | -3.069200509                   | 0.038213474 |
| NDUFC2-KCTD14 | -3.026235878                   | 0.02949017  |
| MAGED4B       | -2.960786576                   | 0.000294536 |
| NPIPA2        | -2.867738625                   | 0.030029419 |
| TRPV1         | -2.797929658                   | 0.001796467 |
| FAM227A       | -2.774544011                   | 0.033735339 |
| TNFRSF6B      | -2.648792691                   | 0.000415903 |
| CYP24A1       | -2.626340756                   | 0.006333261 |
| LOC101930307  | -2.613522436                   | 0.040978617 |
| PVRIG         | -2.608336079                   | 0.014999655 |
| PAQR6         | -2.594494598                   | 0.0003221   |
| ZGLP1         | -2.531562288                   | 0.04838034  |
| YJEFN3        | -2.465440728                   | 0.001511176 |
| NPIPA8        | -2.45372132                    | 0.005597729 |
| USP6          | -2.449627867                   | 0.044635766 |
| LIME1         | -2.429307931                   | 7.42824E-09 |
| PILRB         | -2.367797251                   | 0.045783373 |
| GOLGA8A       | -2.301393611                   | 0.004818476 |
| ZNF117        | -2.276543596                   | 0.006197333 |
| AGAP9         | -2.235246859                   | 0.00151491  |

|              |              |             |
|--------------|--------------|-------------|
| ATAD3B       | -2.220189253 | 3.00913E-05 |
| LCAT         | -2.192587478 | 0.011228088 |
| MMP19        | -2.181092492 | 0.010648742 |
| ZNF280C      | -2.128169206 | 0.007398797 |
| AGER         | -2.109204366 | 0.003329893 |
| BHLHB9       | -2.105165606 | 0.023331156 |
| ADAM8        | -2.094790727 | 0.001794061 |
| COL7A1       | -2.08689165  | 0.036799492 |
| IQCJ-SCHIP1  | -2.079180719 | 0.011818666 |
| AGAP5        | -2.063077119 | 0.001058167 |
| LRP5L        | -2.049250459 | 0.030256052 |
| TGFB2        | -2.023266033 | 0.024427757 |
| KIF18B       | -2.015117622 | 8.17896E-13 |
| RASL11A      | -1.875700701 | 0.008719863 |
| PABPC1L      | -1.843250269 | 0.002441252 |
| TRPC1        | -1.807604949 | 0.016027026 |
| MROH6        | -1.806857279 | 3.34023E-09 |
| ASTL         | -1.793084266 | 0.046437581 |
| CEP85L       | -1.760577965 | 0.024239012 |
| DLX2         | -1.743964883 | 0.000953179 |
| HCK          | -1.74056765  | 7.32254E-05 |
| SAP25        | -1.734942663 | 0.000246472 |
| C8orf44-SGK3 | -1.731773919 | 0.011855612 |
| TBC1D3L      | -1.707946384 | 0.001392582 |
| AGAP6        | -1.66845853  | 0.000595021 |
| CHD5         | -1.656209731 | 0.000319651 |
| HSF4         | -1.64309869  | 0.00521305  |
| NFKBIZ       | -1.618606305 | 0.00080739  |
| CPNE7        | -1.61730058  | 0.049514442 |
| ID3          | -1.615771196 | 5.72474E-23 |
| NR6A1        | -1.610230954 | 0.000295584 |
| RLN2         | -1.59319139  | 0.021898335 |
| L3MBTL1      | -1.590022163 | 0.02902036  |
| NPIP6        | -1.579174444 | 0.009701577 |
| BRSK1        | -1.567267045 | 0.010207465 |
| NBPF11       | -1.564102938 | 5.22176E-05 |
| LOC101060341 | -1.538997202 | 5.88709E-05 |
| SPSB4        | -1.535767012 | 0.000796024 |
| NPIPB12      | -1.530864172 | 5.57266E-09 |

|              |              |             |
|--------------|--------------|-------------|
| BRICD5       | -1.509519951 | 0.011165073 |
| PTBP2        | -1.508484753 | 0.002132968 |
| GOLGA6L9     | -1.507834424 | 0.003667576 |
| LOC107984138 | -1.496419772 | 0.022850821 |
| NPIP3        | -1.445687203 | 1.87933E-09 |
| SHISA2       | -1.433881024 | 0.030684481 |
| KCNMB3       | -1.432331305 | 0.044895376 |
| NBPF12       | -1.430577781 | 8.07698E-05 |
| CDH26        | -1.430170068 | 0.000725616 |
| RUNX2        | -1.422286066 | 0.00870639  |
| ID4          | -1.391980876 | 1.5836E-09  |
| KIF7         | -1.391174629 | 9.0201E-05  |
| PKDCC        | -1.38275886  | 0.049853048 |
| HMCN1        | -1.378532945 | 1.15923E-18 |
| HCN3         | -1.378359226 | 0.010819489 |
| RAB6B        | -1.375948049 | 0.000125167 |
| UHRF1        | -1.360508527 | 1.14671E-12 |
| OTUD3        | -1.353449042 | 0.011786669 |
| CCNL2        | -1.343679677 | 0.041013843 |
| NPIP4        | -1.339524767 | 0.009528667 |
| HCN4         | -1.336170979 | 0.021668494 |
| SMIM32       | -1.323354356 | 0.014786861 |
| PPFIA4       | -1.322972511 | 0.008858245 |
| LTB4R2       | -1.318664229 | 0.021101141 |
| SCML2        | -1.317206666 | 0.010303128 |
| SCX          | -1.311526759 | 0.00047336  |
| EVPLL        | -1.304285643 | 0.028366935 |
| ANKRD6       | -1.296601156 | 0.001898889 |
| ID1          | -1.296357513 | 1.66575E-19 |
| PRRT1B       | -1.293471891 | 1.9006E-07  |
| CCDC85A      | -1.277089489 | 2.28549E-06 |
| NPIPA1       | -1.275195886 | 0.003973534 |
| OLFML2A      | -1.267050869 | 2.73012E-05 |
| MYSM1        | -1.26669652  | 0.009837388 |
| ID2          | -1.259474931 | 3.08594E-14 |
| KCNQ4        | -1.258738793 | 0.002482504 |
| TGM1         | -1.253352156 | 0.020250513 |
| LOC107986800 | -1.248928328 | 0.001448011 |
| CCDC84       | -1.248202921 | 0.024825916 |

|          |              |             |
|----------|--------------|-------------|
| BCL11B   | -1.244958491 | 0.005024351 |
| PBX4     | -1.244834172 | 0.026604115 |
| NPIPB5   | -1.241768324 | 0.008662588 |
| PTPRS    | -1.24153897  | 4.28111E-15 |
| CCN5     | -1.232548741 | 3.82816E-09 |
| SEMA6A   | -1.231037096 | 0.008475716 |
| LPIN1    | -1.197443237 | 5.54558E-05 |
| NFKBID   | -1.194940066 | 0.005045235 |
| MAST1    | -1.192311567 | 0.000375281 |
| MDGA1    | -1.180456576 | 0.041899507 |
| PIF1     | -1.177288243 | 0.002423724 |
| IGFBP3   | -1.173197442 | 0.03688607  |
| C6orf141 | -1.171502068 | 0.000213066 |
| WDR27    | -1.170457317 | 0.037112099 |
| FAM193B  | -1.168886567 | 1.79987E-06 |
| LIN7B    | -1.168856922 | 0.000374043 |
| MTX3     | -1.16616128  | 0.011743755 |
| AMH      | -1.155571899 | 1.2401E-06  |
| IRGQ     | -1.152998345 | 0.006929652 |
| ZNF418   | -1.151590681 | 0.036760645 |
| L1CAM    | -1.144366828 | 5.51692E-10 |
| UGT1A6   | -1.13204212  | 6.8634E-07  |
| VAMP1    | -1.128572421 | 0.03852104  |
| PIK3CD   | -1.12252552  | 0.032802007 |
| GPC2     | -1.114900726 | 0.030594413 |
| CCM2L    | -1.114217384 | 0.00289637  |
| DCUN1D2  | -1.113595659 | 0.009614404 |
| FAM131C  | -1.108964214 | 0.005800177 |
| MAMDC4   | -1.10065876  | 0.039003234 |
| ADGRA2   | -1.096415449 | 0.011019593 |
| ANKS3    | -1.093426386 | 0.001655939 |
| SMAD6    | -1.086911768 | 8.2349E-06  |
| ZIC5     | -1.086811902 | 0.037978858 |
| CARMIL2  | -1.080909979 | 0.009082126 |
| DNMT3B   | -1.073359969 | 3.46418E-08 |
| ADM5     | -1.071892901 | 0.007558682 |
| NBPF19   | -1.069684723 | 4.99172E-07 |
| NBPF20   | -1.066586729 | 0.000703502 |
| CREBZF   | -1.065244967 | 1.679E-06   |



|              |              |             |
|--------------|--------------|-------------|
| TCF7L2       | -1.064969656 | 0.000542889 |
| GIN51        | -1.063624593 | 0.000232582 |
| TPM2         | -1.061160854 | 0.034698734 |
| ADAMTS7      | -1.053839455 | 0.016474607 |
| SYNM         | -1.053278844 | 0.001851129 |
| RAP1GAP2     | -1.049599661 | 0.000691767 |
| MAPK8IP3     | -1.049534282 | 3.5149E-06  |
| CHN1         | -1.047312061 | 0.000262502 |
| GRAMD4       | -1.046391332 | 1.09406E-05 |
| AHRR         | -1.045408437 | 0.000903895 |
| SYNDIG1      | -1.040202554 | 0.014175629 |
| LOC101928841 | -1.036554933 | 0.00479866  |
| NANOS1       | -1.034928097 | 0.015561663 |
| NPIP13       | -1.034672641 | 0.021378999 |
| GLS          | -1.033587282 | 0.000342013 |
| MEX3D        | -1.030567742 | 3.06216E-08 |
| DFFB         | -1.020675466 | 0.026570829 |
| MCC          | -1.016185733 | 0.011846058 |
| JPH1         | -1.01362885  | 0.000657751 |
| CACNB1       | -1.01304857  | 0.030860039 |
| TMEM41B      | -1.007813535 | 0.027618632 |
| CCDC134      | -1.004811281 | 0.007859901 |

---
