# Supplementary material for: ERK MAP Kinase Signaling Regulates RAR Signaling to Confer Retinoid Resistance on Breast Cancer Cells
Source: MDPI journal article supplement (doi:10.3390/cancers14235890), 2022-11-29
Supplement: s1 [file s1]

**Table S2. Gene sets significantly upregulated by the poly (DMAAm-co-APTMA) hydrogel****Curated gene sets**

| Gene sets                                                            | NES       | NOM p-value | FDR q-value |
|----------------------------------------------------------------------|-----------|-------------|-------------|
| DOANE_BREAST_CANCER_CLASSES_UP                                       | 2.6299665 | 0           | 0           |
| SMID_BREAST_CANCER_ERBB2_UP                                          | 2.545426  | 0           | 0           |
| HSIAO_LIVER_SPECIFIC_GENES                                           | 2.5395331 | 0           | 0           |
| KEGG_COMPLEMENT_AND_COAGULATION_CASCADES                             | 2.474672  | 0           | 0           |
| ONDER_CDH1_TARGETS_3_DN                                              | 2.4616623 | 0           | 0           |
| PEDERSEN_METASTASIS_BY_ERBB2_ISOFORM_4                               | 2.440284  | 0           | 0           |
| CROMER_TUMORIGENESIS_DN                                              | 2.41769   | 0           | 0           |
| WP_PEPTIDE_GPCRS                                                     | 2.413965  | 0           | 0           |
| SENGUPTA_NASOPHARYNGEAL_CARCINOMA_DN                                 | 2.3874524 | 0           | 0           |
| HUPER_BREAST_BASAL_VS_LUMINAL_UP                                     | 2.3605404 | 0           | 0           |
| KEGG_LYSOSOME                                                        | 2.3523505 | 0           | 0           |
| LIN_SILENCED_BY_TUMOR_MICROENVIRONMENT                               | 2.3502805 | 0           | 0           |
| WP_COMPLEMENT_AND_COAGULATION_CASCADES                               | 2.3464363 | 0           | 0           |
| MOHANKUMAR_HOXA1_TARGETS_DN                                          | 2.345415  | 0           | 0           |
| LIU_VAV3_PROSTATE_CARCINOGENESIS_UP                                  | 2.3442726 | 0           | 0           |
| REACTOME_INTERLEUKIN_10_SIGNALING                                    | 2.2972586 | 0           | 6.856E-05   |
| HOSHIDA_LIVER_CANCER_SUBCLASS_S3                                     | 2.2892535 | 0           | 6.453E-05   |
| REACTOME_SRP_DEPENDENT_COTRANSLATIONAL_PROTEIN_TARGETING_TO_MEMBRANE | 2.2855177 | 0           | 6.094E-05   |
| KRASNOSELSKAYA_ILF3_TARGETS_UP                                       | 2.2786486 | 0           | 5.774E-05   |
| MCLACHLAN_DENTAL_CARIES_UP                                           | 2.2707064 | 0           | 5.485E-05   |
| BOYLAN_MULTIPLE_MYELOMA_PCA1_UP                                      | 2.2658894 | 0           | 5.224E-05   |
| HECKER_IFNB1_TARGETS                                                 | 2.2480822 | 0           | 9.874E-05   |
| BOSCO_EPITHELIAL_DIFFERENTIATION_MODULE                              | 2.2110972 | 0           | 0.000334    |
| APPEL_IMATINIB_RESPONSE                                              | 2.2108233 | 0           | 0.0003201   |
| CAIRO_LIVER_DEVELOPMENT_DN                                           | 2.2059321 | 0           | 0.0003502   |
| PEDERSEN_METASTASIS_BY_ERBB2_ISOFORM_6                               | 2.1962574 | 0           | 0.0003367   |
| MISSIAGLIA_REGULATED_BY_METHYLATION_UP                               | 2.1959393 | 0           | 0.0003242   |

|                                                                        |           |   |           |
|------------------------------------------------------------------------|-----------|---|-----------|
| VECCHI_GASTRIC_CANCER_ADVANCED_VS_EARLY_DN                             | 2.1909978 | 0 | 0.0003517 |
| WP_FIBRIN_COMPLEMENT_RECEPTOR_3_SIGNALING_PATHWAY                      | 2.1874168 | 0 | 0.0003396 |
| REACTOME_NEUTROPHIL_DEGRANULATION                                      | 2.1873872 | 0 | 0.0003282 |
| WANG_BARRETTS_ESOPHAGUS_AND_ESOPHAGUS_CANCER_UP                        | 2.185738  | 0 | 0.0003176 |
| RICKMAN_HEAD_AND_NECK_CANCER_D                                         | 2.1791682 | 0 | 0.000409  |
| SANA_RESPONSE_TO_IFNG_UP                                               | 2.1678226 | 0 | 0.0006294 |
| BLANCO_MELO_RESPIRATORY_SYNCYTIAL_VIRUS_INFECTION_A594_CELLS_UP        | 2.1676319 | 0 | 0.0006109 |
| REACTOME_DEFECTIVE_C1GALT1C1_CAUSES_TN_POLYAGGLUTINATION_SYNDROME_TNPS | 2.1547022 | 0 | 0.0006549 |
| REACTOME_EUKARYOTIC_TRANSLATION_ELONGATION                             | 2.1532986 | 0 | 0.0006675 |
| REACTOME_ANTIMICROBIAL_PEPTIDES                                        | 2.15258   | 0 | 0.0006494 |
| KUROZUMI_RESPONSE_TO_ONCOCYTIC_VIRUS                                   | 2.1489928 | 0 | 0.0006609 |
| REACTOME_TERMINATION_OF_O_GLYCAN_BIOSYNTHESIS                          | 2.1479154 | 0 | 0.0006439 |
| ZHONG_SECRETOME_OF_LUNG_CANCER_AND_MACROPHAGE                          | 2.1455925 | 0 | 0.0006278 |
| BENNETT_SYSTEMIC_LUPUS_ERYTHEMATOSUS                                   | 2.1444566 | 0 | 0.0006125 |
| SARRIO_EPITHELIAL_MESENCHYMAL_TRANSITION_DN                            | 2.143198  | 0 | 0.0006236 |
| SMID_BREAST_CANCER_RELAPSE_IN_BONE_UP                                  | 2.1380198 | 0 | 0.0007365 |
| LIANG_SILENCED_BY_METHYLATION_2                                        | 2.1349673 | 0 | 0.0007451 |
| BILANGES_SERUM_AND_RAPAMYCIN_SENSITIVE_GENES                           | 2.1311007 | 0 | 0.0007777 |
| BLANCO_MELO_COVID19_SARS_COV_2_POS_PATIENT_LUNG_TISSUE_UP              | 2.1256933 | 0 | 0.0009279 |
| KEGG_RIBOSOME                                                          | 2.1200156 | 0 | 0.0010693 |
| DOANE_BREAST_CANCER_ESR1_UP                                            | 2.1095352 | 0 | 0.0012056 |
| NABA_ECM_REGULATORS                                                    | 2.1078854 | 0 | 0.0012481 |
| ANDERSEN_CHOLANGIOCARCINOMA_CLASS2                                     | 2.1074522 | 0 | 0.0012451 |
| REACTOME_O_LINKED_GLYCOSYLATION_OF_MUCINS                              | 2.0808702 | 0 | 0.002314  |
| REACTOME_FORMATION_OF_FIBRIN_CLOT_CLOTTING_CASCADE                     | 2.077708  | 0 | 0.0024382 |
| WP_FOLATE_METABOLISM                                                   | 2.0775218 | 0 | 0.0023922 |
| NAKAMURA_METASTASIS_MODEL_DN                                           | 2.0753367 | 0 | 0.002409  |
| REACTOME_COMPLEMENT_CASCADE                                            | 2.0735288 | 0 | 0.0024251 |
| ONDER_CDH1_TARGETS_2_DN                                                | 2.0707185 | 0 | 0.0024603 |
| DEMAGALHAES_AGING_UP                                                   | 2.0681553 | 0 | 0.0025123 |

|                                                                 |           |             |           |
|-----------------------------------------------------------------|-----------|-------------|-----------|
| LEE_LIVER_CANCER_CIPROFIBRATE_UP                                | 2.0578966 | 0           | 0.0030915 |
| REACTOME_SLC_MEDIATED_TRANSMEMBRANE_TRANSPORT                   | 2.0578482 | 0           | 0.0030391 |
| BLANCO_MELO_COVID19_SARS_COV_2_INFECTION_CALU3_CELLS_UP         | 2.0537763 | 0           | 0.0031705 |
| PEDERSEN_METASTASIS_BY_ERBB2_ISOFORM_1                          | 2.053008  | 0           | 0.0032608 |
| GILDEA_METASTASIS                                               | 2.0527084 | 0           | 0.0032082 |
| JINESH_BLEBBISHIELD_TRANSFORMED_STEM_CELL_SPHERES_UP            | 2.0479884 | 0           | 0.0033639 |
| COLIN_PILOCYTIC_ASTROCYTOMA_VS_GLIOMASTOMA_UP                   | 2.0466928 | 0           | 0.0033972 |
| LIEN_BREAST_CARCINOMA_METAPLASTIC_VS_DUCTAL_DN                  | 2.0452902 | 0           | 0.0034462 |
| REACTOME_RESPONSE_TO_ELEVATED_PLATELET_CYTOSOLIC_CA2            | 2.0431786 | 0           | 0.0035109 |
| WP_VITAMIN_B12_METABOLISM                                       | 2.0327756 | 0.002132196 | 0.0040301 |
| BOYVAULT_LIVER_CANCER_SUBCLASS_G56_DN                           | 2.031753  | 0           | 0.0040512 |
| REACTOME_IRAK4_DEFICIENCY_TLR2_4                                | 2.0182216 | 0.002105263 | 0.0052094 |
| ELVIDGE_HIF1A_AND_HIF2A_TARGETS_DN                              | 2.0176268 | 0           | 0.0052122 |
| REACTOME_EUKARYOTIC_TRANSLATION_INITIATION                      | 2.0163784 | 0           | 0.0052615 |
| SERVITJA_ISLET_HNF1A_TARGETS_DN                                 | 2.0142512 | 0           | 0.0053854 |
| LIM_MAMMARY_STEM_CELL_DN                                        | 2.0124516 | 0           | 0.0054164 |
| DELPUECH_FOXO3_TARGETS_UP                                       | 2.0114164 | 0           | 0.0054911 |
| ANDERSEN_LIVER_CANCER_KRT19_DN                                  | 2.0095577 | 0           | 0.0056207 |
| PID_INTEGRIN2_PATHWAY                                           | 2.0068643 | 0           | 0.0057764 |
| REACTOME_SELENOAMINO_ACID_METABOLISM                            | 2.0057683 | 0           | 0.0058435 |
| CAVARD_LIVER_CANCER_MALIGNANT_VS_BENIGN                         | 2.0043347 | 0           | 0.0059084 |
| RIGGINS_TAMOXIFEN_RESISTANCE_UP                                 | 1.99816   | 0           | 0.0063744 |
| WANG_METASTASIS_OF_BREAST_CANCER_ESR1_DN                        | 1.9980518 | 0           | 0.0062947 |
| ZHANG_INTERFERON_RESPONSE                                       | 1.9922775 | 0           | 0.0067946 |
| COLDREN_GEFITINIB_RESISTANCE_DN                                 | 1.9885302 | 0           | 0.0070178 |
| REACTOME_CHEMOKINE_RECEPTORS_BIND_CHEMOKINES                    | 1.9862468 | 0           | 0.007222  |
| MCDOWELL_ACUTE_LUNG_INJURY_UP                                   | 1.984051  | 0.002105263 | 0.0074086 |
| WP_BLOOD_CLOTTING_CASCADE                                       | 1.9814872 | 0           | 0.0076283 |
| WP_GLYCOSYLATION_AND_RELATED_CONGENITAL_DEFECTS                 | 1.9797422 | 0           | 0.0076662 |
| BLANCO_MELO_HUMAN_PARAINFLUENZA_VIRUS_3_INFECTION_A594_CELLS_UP | 1.9792496 | 0           | 0.007641  |

|                                                                                    |           |            |           |
|------------------------------------------------------------------------------------|-----------|------------|-----------|
| SENGUPTA_NASOPHARYNGEAL_CARCCINOMA_WITH_LMP1_DN                                    | 1.9740973 | 0          | 0.0081379 |
| LEE_LIVER_CANCER_ACOX1_UP                                                          | 1.9738998 | 0          | 0.0080709 |
| BIOCARTA_TFF_PATHWAY                                                               | 1.9708114 | 0          | 0.0082465 |
| WAGNER_APO2_SENSITIVITY                                                            | 1.9695928 | 0          | 0.0083593 |
| KIM_LRRC3B_TARGETS                                                                 | 1.967382  | 0          | 0.0085518 |
| XIE_ST_HSC_S1PR3_OE_UP                                                             | 1.9667645 | 0          | 0.0085416 |
| BARIS_THYROID_CANCER_DN                                                            | 1.9667482 | 0          | 0.0084624 |
| WU_SILENCED_BY_METHYLATION_IN_BLADDER_CANCER                                       | 1.9663618 | 0          | 0.0084199 |
| BLANCO_MELO_COVID19_SARS_COV_2_INFECTION_A594_ACE2_EXPRESSING_CELLS_RUXOLITINIB_DN | 1.9662352 | 0          | 0.0083322 |
| ROY_WOUND_BLOOD_VESSEL_DN                                                          | 1.9662112 | 0          | 0.0082463 |
| ELVIDGE_HYPOXIA_BY_DMOG_UP                                                         | 1.9650836 | 0          | 0.00824   |
| ELVIDGE_HYPOXIA_UP                                                                 | 1.9619198 | 0          | 0.008486  |
| REACTOME_REGULATION_OF_TLR_BY_ENDOGENOUS_LIGAND                                    | 1.9593879 | 0          | 0.00865   |
| WILENSKY_RESPONSE_TO_DARAPLADIB                                                    | 1.9581206 | 0          | 0.0087379 |
| JOSEPH_RESPONSE_TO_SODIUM_BUTYRATE_UP                                              | 1.9439317 | 0          | 0.0106968 |
| ZHANG_ANTIVIRAL_RESPONSE_TO_RIBAVIRIN_UP                                           | 1.942997  | 0.00204918 | 0.0107302 |
| ODONNELL_TARGETS_OF_MYC_AND_TFRC_UP                                                | 1.9422415 | 0          | 0.0107311 |
| WENG_POR_TARGETS_LIVER_DN                                                          | 1.939987  | 0          | 0.0110353 |
| WP_CYTOPLASMIC_RIBOSOMAL_PROTEINS                                                  | 1.9391725 | 0          | 0.0110036 |
| NABA_MATRISOME_ASSOCIATED                                                          | 1.9383389 | 0          | 0.0110331 |
| FUJII_YBX1_TARGETS_UP                                                              | 1.9380156 | 0          | 0.0110017 |
| CHIANG_LIVER_CANCER_SUBCLASS_PROLIFERATION_DN                                      | 1.936174  | 0          | 0.0111908 |
| REACTOME_TRANSPORT_OF_INORGANIC_CATIONS_ANIONS_AND_AMINO_ACIDS_OLIGOPEPTIDES       | 1.9341414 | 0          | 0.0113563 |
| WP_GLYCOLYSIS_AND_GLUONEOGENESIS                                                   | 1.9332935 | 0          | 0.0114115 |
| ELVIDGE_HIF1A_TARGETS_DN                                                           | 1.9282204 | 0          | 0.0120998 |
| SMID_BREAST_CANCER_RELAPSE_IN_PLEURA_DN                                            | 1.9271084 | 0.00212766 | 0.0121281 |
| ZHENG_IL22_SIGNALING_UP                                                            | 1.9269191 | 0          | 0.012031  |
| PAPASPYRIDONOS_UNSTABLE_ATEROSCLEROTIC_PLAQUE_UP                                   | 1.9248494 | 0          | 0.0122861 |
| WP_HUMAN_COMPLEMENT_SYSTEM                                                         | 1.9245589 | 0          | 0.012227  |
| TARTE_PLASMA_CELL_VS_B_LYMPHOCYTE_UP                                               | 1.9233407 | 0          | 0.0124127 |

|                                                                             |           |             |           |
|-----------------------------------------------------------------------------|-----------|-------------|-----------|
| HINATA_NFKB_TARGETS_KERATINOCYTE_UP                                         | 1.919058  | 0           | 0.0129174 |
| FLECHNER_BIOPSY_KIDNEY_TRANSPLANT_REJECTED_VS_OK_UP                         | 1.9178106 | 0           | 0.0130831 |
| BOWIE_RESPONSE_TO_TAMOXIFEN                                                 | 1.9174716 | 0           | 0.0130375 |
| GREENBAUM_E2A_TARGETS_DN                                                    | 1.9170926 | 0           | 0.0129567 |
| WESTON_VEGFA_TARGETS                                                        | 1.913691  | 0           | 0.0134299 |
| REACTOME_PEPTIDE_LIGAND_BINDING_RECEPTORS                                   | 1.9129725 | 0           | 0.0134185 |
| STEGER_ADIPOGENESIS_DN                                                      | 1.9129474 | 0.002164502 | 0.0133102 |
| REACTOME_MATURATION_OF_SARS_COV_2_SPIKE_PROTEIN                             | 1.9122106 | 0           | 0.0133604 |
| GROSS_HYPOXIA_VIA_ELK3_DN                                                   | 1.9099122 | 0           | 0.0137052 |
| RICKMAN_HEAD_AND_NECK_CANCER_E                                              | 1.9089155 | 0           | 0.0138301 |
| WP_CORI_CYCLE                                                               | 1.9085906 | 0.002114165 | 0.0137559 |
| WP_IL1_AND_MEGAKARYOCYTES_IN_OBESITY                                        | 1.907347  | 0.002066116 | 0.0138427 |
| LENAOUR_DENDRITIC_CELL_MATURATION_DN                                        | 1.904063  | 0           | 0.0144401 |
| PID_UPA_UPAR_PATHWAY                                                        | 1.9037852 | 0           | 0.0143885 |
| WP_COMPUTATIONAL_MODEL_OF_AEROBIC_GLYCOLYSIS                                | 1.9037336 | 0           | 0.0143044 |
| YAMASHITA_LIVER_CANCER_STEM_CELL_DN                                         | 1.9022356 | 0           | 0.0143613 |
| SCHUETZ_BREAST_CANCER_DUCTAL_INVASIVE_DN                                    | 1.8997484 | 0           | 0.0148965 |
| KEGG_TRYPTOPHAN_METABOLISM                                                  | 1.8882023 | 0           | 0.0170402 |
| ZHONG_SECRETOME_OF_LUNG_CANCER_AND_FIBROBLAST                               | 1.8879836 | 0           | 0.0169549 |
| SANA_TNF_SIGNALING_UP                                                       | 1.885562  | 0.002197802 | 0.0173406 |
| REACTOME_POST_TRANSLATIONAL_MODIFICATION_SYNTHESIS_OF_GPI_ANCHORED_PROTEINS | 1.8852066 | 0           | 0.0173098 |
| KEGG_PROTEIN_EXPORT                                                         | 1.8837197 | 0.002197802 | 0.0174285 |
| WENG_POR_TARGETS_GLOBAL_DN                                                  | 1.8832507 | 0           | 0.0173977 |
| JOHNSTONE_PARVB_TARGETS_2_UP                                                | 1.8827304 | 0           | 0.0173519 |
| PID_NFAT_TFPATHWAY                                                          | 1.8786004 | 0.002150538 | 0.0181503 |
| REACTOME_SPHINGOLIPID_DE_NOVO_BIOSYNTHESIS                                  | 1.878009  | 0.002016129 | 0.018206  |
| REACTOME_INSULIN_RECEPTOR_RECYCLING                                         | 1.874612  | 0           | 0.0187609 |
| CHARAFE_BREAST_CANCER_BASAL_VS_MESENCHYMAL_UP                               | 1.8744605 | 0           | 0.0186689 |
| DOANE_RESPONSE_TO_ANDROGEN_UP                                               | 1.8742765 | 0           | 0.0185932 |
| ABE_VEGFA_TARGETS_30MIN                                                     | 1.872747  | 0           | 0.018815  |

|                                                                                                                             |           |             |           |
|-----------------------------------------------------------------------------------------------------------------------------|-----------|-------------|-----------|
| LINDSTEDT_DENDRITIC_CELL_MATURATION_D                                                                                       | 1.872141  | 0.002016129 | 0.0188418 |
| REACTOME_SPHINGOLIPID_METABOLISM                                                                                            | 1.8703218 | 0           | 0.0191104 |
| REACTOME_COMMON_PATHWAY_OF_FIBRIN_CLOT_FORMATION                                                                            | 1.867742  | 0.004132231 | 0.0195728 |
| BLANCO_MELO_COVID19_BRONCHIAL_EPITHELIAL_CELLS_SARS_COV_2_INFECTION_UP                                                      | 1.8676628 | 0           | 0.0194578 |
| WP_SELENIUM_MICRONUTRIENT_NETWORK                                                                                           | 1.864195  | 0.002087683 | 0.0201327 |
| GRANDVAUX_IFN_RESPONSE_NOT_VIA_IRF3                                                                                         | 1.8635348 | 0.002141328 | 0.0201362 |
| RUTELLA_RESPONSE_TO_HGF_VS_CSF2RB_AND_IL4_UP                                                                                | 1.8624605 | 0           | 0.0202038 |
| REACTOME_O_LINKED_GLYCOSYLATION                                                                                             | 1.8581941 | 0           | 0.021093  |
| HELLEBREKERS_SILENCED_DURING_TUMOR_ANGIOGENESIS                                                                             | 1.8552474 | 0           | 0.0216641 |
| MOSERLE_IFNA_RESPONSE                                                                                                       | 1.8491564 | 0           | 0.0230913 |
| BROWN_MYELOID_CELL_DEVELOPMENT_UP                                                                                           | 1.8489788 | 0           | 0.0229868 |
| OHGUCHI_LIVER_HNF4A_TARGETS_UP                                                                                              | 1.847793  | 0           | 0.0231443 |
| BROWNE_HCMV_INFECTION_2HR_UP                                                                                                | 1.8477287 | 0.006289308 | 0.0230065 |
| CREIGHTON_AKT1_SIGNALING_VIA_MTOR_DN                                                                                        | 1.8438833 | 0.002183406 | 0.0237658 |
| BIOCARTA_AMI_PATHWAY                                                                                                        | 1.8435512 | 0.002016129 | 0.0236933 |
| TARTE_PLASMA_CELL_VS_PLASMABLAST_UP                                                                                         | 1.8433173 | 0           | 0.0236489 |
| WP_GPCRS_CLASS_A_RHODOPSINLIKE                                                                                              | 1.8431516 | 0           | 0.023538  |
| SMID_BREAST_CANCER_RELAPSE_IN_LUNG_DN                                                                                       | 1.8389763 | 0.002008032 | 0.0245058 |
| WESTON_VEGFA_TARGETS_3HR                                                                                                    | 1.8372169 | 0           | 0.0248575 |
| FARDIN_HYPOXIA_11                                                                                                           | 1.8368168 | 0.002183406 | 0.0248069 |
| HSIAO_HOUSEKEEPING_GENES                                                                                                    | 1.8336359 | 0           | 0.0257487 |
| WP_TRYPTOPHAN_METABOLISM                                                                                                    | 1.8318194 | 0.00422833  | 0.0261268 |
| KEGG_HISTIDINE_METABOLISM                                                                                                   | 1.8307868 | 0.003976143 | 0.0262675 |
| RUTELLA_RESPONSE_TO_HGF_UP                                                                                                  | 1.8289618 | 0           | 0.0266741 |
| REACTOME_BIOSYNTHESIS_OF_THE_N_GLYCAN_PRECURSOR_DOLICHOL_LIPID_LINKED_OLIGOSACCHARIDE_LLO_AND_TRANSFER_TO_A_NASCENT_PROTEIN | 1.8281268 | 0           | 0.0267153 |
| REACTOME_DECTIN_2_FAMILY                                                                                                    | 1.8273399 | 0.004246285 | 0.0267886 |
| REACTOME_INTERFERON_ALPHA_BETA_SIGNALING                                                                                    | 1.8271118 | 0           | 0.0267289 |
| SMID_BREAST_CANCER_RELAPSE_IN_BRAIN_DN                                                                                      | 1.8242095 | 0.002061856 | 0.0276049 |
| KEGG_VIBRIO_CHOLERAЕ_INFECTION                                                                                              | 1.8237619 | 0           | 0.0275972 |
| REACTOME_FERTILIZATION                                                                                                      | 1.8236148 | 0           | 0.027466  |

|                                                                                                                    |           |             |           |
|--------------------------------------------------------------------------------------------------------------------|-----------|-------------|-----------|
| NAKAJIMA_MAST_CELL                                                                                                 | 1.8232684 | 0.004357298 | 0.0273795 |
| CHARAFE_BREAST_CANCER_LUMINAL_VS_MESENCHYMAL_UP                                                                    | 1.8189963 | 0           | 0.0285682 |
| TIEN_INTESTINE_PROBIOTICS_24HR_DN                                                                                  | 1.8163261 | 0           | 0.0292467 |
| CHANG_IMMORTALIZED_BY_HPV31_DN                                                                                     | 1.8146586 | 0           | 0.0296637 |
| CHEOK_RESPONSE_TO_MERCAPTOPYRINE_DN                                                                                | 1.8094089 | 0.002178649 | 0.0311609 |
| DAUER_STAT3_TARGETS_DN                                                                                             | 1.8092616 | 0.002012072 | 0.0310085 |
| TSAI_RESPONSE_TO_RADIATION_THERAPY                                                                                 | 1.8081014 | 0.006122449 | 0.0312189 |
| VANDESLUIS_COMMD1_TARGETS_GROUP_3_UP                                                                               | 1.8069416 | 0.001976285 | 0.0313864 |
| TIAN_BHLHA15_TARGETS                                                                                               | 1.8042996 | 0.004115226 | 0.0319919 |
| NAKAYAMA_SOFT_TISSUE_TUMORS_PCA1_UP                                                                                | 1.8041657 | 0.004535148 | 0.0318682 |
| STEARMAN_TUMOR_FIELD_EFFECT_UP                                                                                     | 1.804142  | 0.0041841   | 0.0317045 |
| REACTOME_PLASMA_LIPOPROTEIN_CLEARANCE                                                                              | 1.8036507 | 0.004132231 | 0.0316758 |
| BECKER_TAMOXIFEN_RESISTANCE_UP                                                                                     | 1.8026596 | 0.00210084  | 0.0319329 |
| MEBARKI_HCC_PROGENITOR_WNT_UP_CTNNB1_INDEPENDENT                                                                   | 1.7984971 | 0.012738854 | 0.0332767 |
| SU_LIVER                                                                                                           | 1.7966913 | 0.002053388 | 0.0337279 |
| KEGG_RIBOFLAVIN_METABOLISM                                                                                         | 1.7945447 | 0.004175365 | 0.0342143 |
| DELYS_THYROID_CANCER_UP                                                                                            | 1.7944449 | 0           | 0.0340769 |
| REACTOME_DISEASES_ASSOCIATED_WITH_O_GLYCOSYLATION_OF_PROTEIN<br>S                                                  | 1.7936753 | 0.002040816 | 0.0341662 |
| ZHENG_FOXP3_TARGETS_UP                                                                                             | 1.7928536 | 0.004273505 | 0.034381  |
| JAEGGER_METASTASIS_DN                                                                                              | 1.7916855 | 0           | 0.0346824 |
| REACTOME_INTERLEUKIN_4_AND_INTERLEUKIN_13_SIGNALING                                                                | 1.7908906 | 0.00210084  | 0.034772  |
| REACTOME_ACTIVATION_OF_THE_MRNA_UPON_BINDING_OF_THE_CAP_BIND<br>ING_COMPLEX_AND_EIFS_AND_SUBSEQUENT_BINDING_TO_43S | 1.7904652 | 0           | 0.0347613 |
| REACTOME_SARS_COV_2_INFECTION                                                                                      | 1.787979  | 0           | 0.0356067 |
| REACTOME_DISEASES_ASSOCIATED_WITH_N_GLYCOSYLATION_OF_PROTEIN<br>S                                                  | 1.7877461 | 0.001988072 | 0.0355056 |
| WU_CELL_MIGRATION                                                                                                  | 1.7839221 | 0           | 0.0368764 |
| KORKOLA_TERATOMA_UP                                                                                                | 1.7803221 | 0.004329004 | 0.0381409 |
| BURTON_ADIPOGENESIS_8                                                                                              | 1.7798847 | 0           | 0.0381625 |
| PLASARI_NFIC_TARGETS_BASAL_UP                                                                                      | 1.7784662 | 0.010060363 | 0.0384655 |
| SPIRA_SMOKERS_LUNG_CANCER_UP                                                                                       | 1.7769481 | 0.010683761 | 0.0388831 |
| BRACHAT_RESPONSE_TO_METHOTREXATE_DN                                                                                | 1.7755489 | 0.004273505 | 0.0393377 |

|                                                                                                                                  |           |             |           |
|----------------------------------------------------------------------------------------------------------------------------------|-----------|-------------|-----------|
| JINESH_BLEBBISHIELD_VS_LIVE_CONTROL_DN                                                                                           | 1.7739702 | 0           | 0.0397046 |
| SALVADOR_MARTIN_PEDIATRIC_TBD_ANTI_TNF_THERAPY_NONRESPONDER_POST_TREATMENT_UP                                                    | 1.7737939 | 0.010438413 | 0.0395723 |
| ZHOU_INFLAMMATORY_RESPONSE_LPS_UP                                                                                                | 1.7727582 | 0.002132196 | 0.0398048 |
| MENSE_HYPOXIA_UP                                                                                                                 | 1.7715067 | 0           | 0.0401175 |
| WIELAND_UP_BY_HBV_INFECTION                                                                                                      | 1.7705755 | 0.002159827 | 0.0402681 |
| CHIARADONNA_NEOPLASTIC_TRANSFORMATION_CDC25_DN                                                                                   | 1.7699796 | 0           | 0.0402892 |
| WEST_ADRENOCORTICAL_TUMOR_MARKERS_DN                                                                                             | 1.7690269 | 0.002066116 | 0.0405549 |
| KIM_LIVER_CANCER_POOR_SURVIVAL_DN                                                                                                | 1.7684075 | 0.014799154 | 0.0406244 |
| NABA_MATRISOME                                                                                                                   | 1.7680725 | 0           | 0.0405677 |
| TIEN_INTESTINE_PROBIOTICS_6HR_UP                                                                                                 | 1.7679032 | 0           | 0.0404109 |
| YAO_TEMPORAL_RESPONSE_TO_PROGESTERONE_CLUSTER_9                                                                                  | 1.7673994 | 0           | 0.0404106 |
| KEGG_TYPE_I_DIABETES_MELLITUS                                                                                                    | 1.7643201 | 0.008791209 | 0.0415474 |
| REACTOME_REGULATION_OF_INSULIN_LIKE_GROWTH_FACTOR_IGF_TRANSPORT_AND_UPTAKE_BY_INSULIN_LIKE_GROWTH_FACTOR_BINDING_PROTEINS_IGFBPS | 1.7637457 | 0           | 0.0416504 |
| NELSON_RESPONSE_TO_ANDROGEN_UP                                                                                                   | 1.7623998 | 0.006437768 | 0.0420901 |
| POOLA_INVASIVE_BREAST_CANCER_DN                                                                                                  | 1.7621318 | 0           | 0.0420186 |
| HESS_TARGETS_OF_HOXA9_AND_MEIS1_DN                                                                                               | 1.7614987 | 0.002096436 | 0.0421291 |
| HERNANDEZ_MITOTIC_ARREST_BY_DOCETAXEL_2_DN                                                                                       | 1.7599777 | 0.015904572 | 0.042622  |
| REACTOME_MISCELLANEOUS_TRANSPORT_AND_BINDING_EVENTS                                                                              | 1.7590274 | 0.002227172 | 0.0429279 |
| WUNDER_INFLAMMATORY_RESPONSE_AND_CHOLESTEROL_UP                                                                                  | 1.7588319 | 0.002057613 | 0.0428057 |
| MOOTHA_GLYCOLYSIS                                                                                                                | 1.7584457 | 0.01091703  | 0.0428286 |
| WESTON_VEGFA_TARGETS_6HR                                                                                                         | 1.7576017 | 0.002202643 | 0.0429942 |
| GROSS_HYPOXIA_VIA_ELK3_AND_HIF1A_UP                                                                                              | 1.7571435 | 0           | 0.0430353 |
| BOYLAN_MULTIPLE_MYELOMA_C_D_DN                                                                                                   | 1.7552255 | 0           | 0.0437062 |
| MOOTHA_GLUCONEOGENESIS                                                                                                           | 1.7549627 | 0.004048583 | 0.0436351 |
| BASAKI_YBX1_TARGETS_DN                                                                                                           | 1.7549187 | 0           | 0.0434659 |
| OUYANG_PROSTATE_CANCER_MARKERS                                                                                                   | 1.7544974 | 0.008333334 | 0.0434524 |
| HUMMERICH_BENIGN_SKIN_TUMOR_UP                                                                                                   | 1.7523417 | 0.00886918  | 0.0442505 |
| REACTOME_RESPONSE_OF_EIF2AK4_GCN2_TO_AMINO_ACID_DEFICIENCY                                                                       | 1.75182   | 0           | 0.0443266 |
| TURASHVILI_BREAST_LOBULAR_CARCINOMA_VS_DUCTAL_NORMAL_DN                                                                          | 1.7508197 | 0.002040816 | 0.044583  |
| UZONYI_RESPONSE_TO_LEUKOTRIENE_AND_THROMBIN                                                                                      | 1.7504139 | 0           | 0.0445738 |



|                                                                        |           |             |           |
|------------------------------------------------------------------------|-----------|-------------|-----------|
| LIU_IL13_PRIMING_MODEL                                                 | 1.74849   | 0.014799154 | 0.04529   |
| ICHIBA_GRAFT_VERSUS_HOST_DISEASE_35D_UP                                | 1.7473887 | 0           | 0.0456067 |
| BOWIE_RESPONSE_TO_EXTRACELLULAR_MATRIX                                 | 1.7464036 | 0.017738359 | 0.0458842 |
| LINDVALL_IMMORTALIZED_BY_TERT_DN                                       | 1.7451417 | 0           | 0.0463767 |
| ABE_INNER_EAR                                                          | 1.7449265 | 0.002057613 | 0.0462799 |
| REACTOME_TRANSLATION_OF_SARS_COV_2_STRUCTURAL_PROTEINS                 | 1.7438906 | 0.00204499  | 0.0466191 |
| STAMBOLSKY_TARGETS_OF_MUTATED_TP53_DN                                  | 1.7413279 | 0.002053388 | 0.0476478 |
| LINDSTEDT_DENDRITIC_CELL_MATURATION_A                                  | 1.7407281 | 0           | 0.0477648 |
| FERRANDO_TAL1_NEIGHBORS                                                | 1.7398938 | 0.010683761 | 0.0479879 |
| CREIGHTON_ENDOCRINE_THERAPY_RESISTANCE_5                               | 1.7396201 | 0           | 0.0479085 |
| DIAZ_CHRONIC_MEYLOGENOUS_LEUKEMIA_DN                                   | 1.7388191 | 0           | 0.0481598 |
| LI_INDUCED_T_TO_NATURAL_KILLER_UP                                      | 1.7368821 | 0           | 0.0488695 |
| VERRECCHIA_RESPONSE_TO_TGFB1_C2                                        | 1.7362932 | 0.002114165 | 0.0489446 |
| BILBAN_B_CLL_LPL_UP                                                    | 1.7351054 | 0.006711409 | 0.0493579 |
| LUI_THYROID_CANCER_CLUSTER_5                                           | 1.7343742 | 0.015904572 | 0.0494787 |
| WP_TYPE_I_COLLAGEN_SYNTHESIS_IN_THE_CONTEXT_OF_OSTEOGENESIS_IMPERFECTA | 1.7328291 | 0.008368201 | 0.0499982 |
| REACTOME_DISEASES_OF_IMMUNE_SYSTEM                                     | 1.7328187 | 0.00408998  | 0.04981   |

### Oncogenic signature gene sets

| Gene sets                       | NES       | NOM p-value | FDR q-value |
|---------------------------------|-----------|-------------|-------------|
| ERBB2_UP.V1_UP                  | 2.904524  | 0           | 0           |
| MEK_UP.V1_UP                    | 2.22213   | 0           | 0           |
| LTE2_UP.V1_UP                   | 2.185027  | 0           | 0           |
| EGFR_UP.V1_UP                   | 2.105998  | 0           | 0.0003639   |
| KRAS.KIDNEY_UP.V1_DN            | 2.0363872 | 0           | 0.0002911   |
| SINGH_KRAS_DEPENDENCY_SIGNATURE | 1.8928977 | 0           | 0.002644    |
| KRAS.300_UP.V1_DN               | 1.8229157 | 0           | 0.0052513   |
| KRAS.600_UP.V1_DN               | 1.787539  | 0           | 0.0072562   |
| LEF1_UP.V1_DN                   | 1.7701716 | 0           | 0.0082114   |
| KRAS.BREAST_UP.V1_UP            | 1.7104772 | 0.00203666  | 0.0140178   |

|                               |           |             |           |
|-------------------------------|-----------|-------------|-----------|
| KRAS.LUNG_UP.V1_DN            | 1.6812701 | 0.002016129 | 0.0175686 |
| ESC_V6.5_UP_EARLY.V1_DN       | 1.6506543 | 0.002155172 | 0.022199  |
| RAF_UP.V1_UP                  | 1.647511  | 0.00407332  | 0.0213903 |
| ALK_DN.V1_UP                  | 1.6474016 | 0.006369427 | 0.0199414 |
| PKCA_DN.V1_DN                 | 1.6291333 | 0.00210084  | 0.0224072 |
| P53_DN.V2_UP                  | 1.6115099 | 0.002040816 | 0.0254151 |
| MEL18_DN.V1_DN                | 1.6073984 | 0.00210084  | 0.0248278 |
| ALK_DN.V1_DN                  | 1.5707607 | 0.008230452 | 0.0342382 |
| KRAS.50_UP.V1_DN              | 1.5577035 | 0.02        | 0.0366972 |
| EIF4E_DN                      | 1.5452398 | 0.010330578 | 0.0392947 |
| SNF5_DN.V1_UP                 | 1.5420208 | 0.00407332  | 0.038521  |
| RELA_DN.V1_DN                 | 1.5190756 | 0.022403259 | 0.0463089 |
| KRAS.600.LUNG.BREAST_UP.V1_DN | 1.513657  | 0.00203252  | 0.0464644 |
| STK33_UP                      | 1.511501  | 0           | 0.0455879 |
| AKT_UP.V1_DN                  | 1.5032269 | 0.002074689 | 0.0469793 |

---
