# Supplementary material for: ERK MAP Kinase Signaling Regulates RAR Signaling to Confer Retinoid Resistance on Breast Cancer Cells
Source: MDPI journal article supplement (doi:10.3390/cancers14235890), 2022-11-29

Figure S1. Uncropped images of immunoblotting data.

Figure 1A

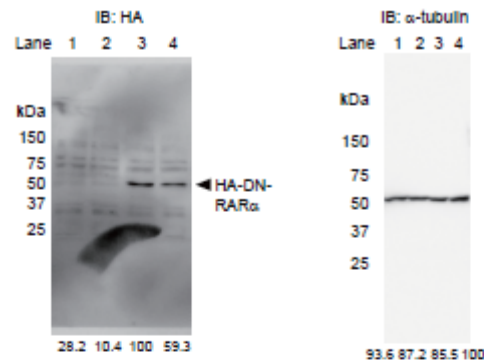

Figure 1B

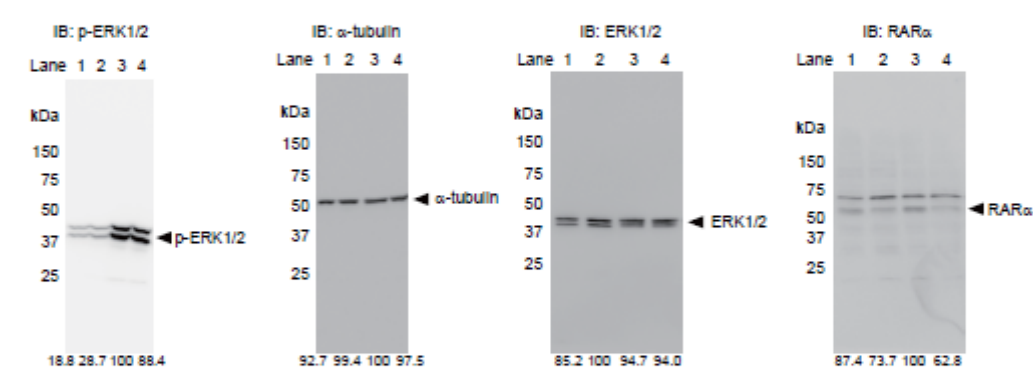

Figure 2A

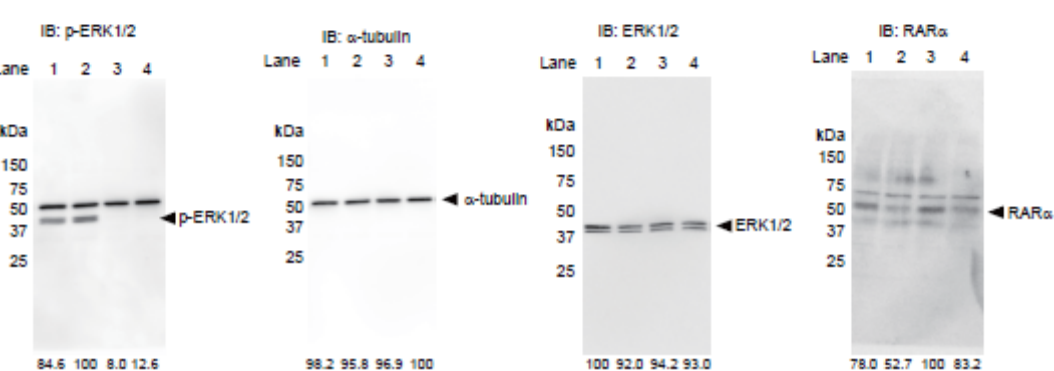

**Figure S2.** Kaplan-Meier curves of survival (left) and relapse-free survival (right) for all the breast cancer patients categorized into the three groups based on the RA- and ERK-upregulated genes.

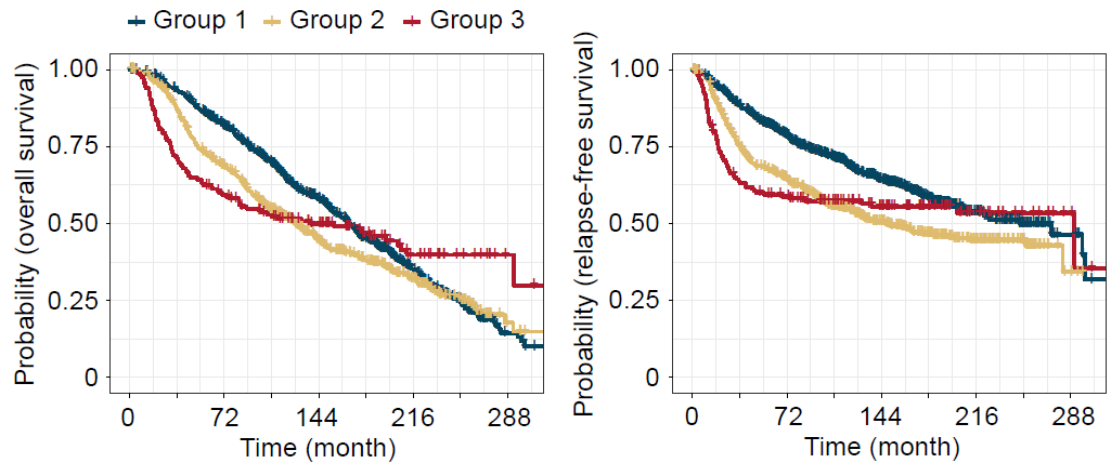

Supplement: s1 [file s1]
