# Supplementary material for: ERK MAP Kinase Signaling Regulates RAR Signaling to Confer Retinoid Resistance on Breast Cancer Cells
Source: Cancers (Basel). 2022 Nov 29;14(23):5890. doi: 10.3390/cancers14235890 (PMC9739577; doi:10.3390/cancers14235890)
Supplement: Supplementary file 1 [file cancers-14-05890-s001.zip]

Archive with 4 entries (4 files):
- Supplementary_material.pdf
- TableS1.pdf
- TableS2.pdf
- TableS3.pdf
